# Supplementary material for: A Healthy Brazil Nut Beverage with Opuntia stricta var. dillenii Green Extract: Beverage Stability and Changes in Bioactives and Antioxidant Activity during Cold Storage
Source: MDPI journal article supplement (doi:10.3390/foods13081237), 2024-04-18
Supplement: s1 [file s1]

## SUPPLEMENTARY MATERIAL

**Figure S1.** Image of Brazil nut (*Bertholletia excels* HBK)

**Figure S2.** HPLC chromatogram of betalains and phenolic compounds from (a) OPD, (b) BN ED 1%, and (c) BN ED 0.5% at 280 nm. Numbers correspond to the identified compounds shown in Tables 1 and 4.

**Figure S3.** HPLC chromatogram of betalains and phenolic compounds from (a) OPD, (b) BN ED 1%, and (c) BN ED 0.5% at 370 nm. Numbers correspond to the identified compounds shown in Tables 1 and 4.

**Figure S4.** HPLC chromatogram of betalains and phenolic compounds from (a) OPD, (b) BN ED 1%, and (c) BN ED 0.5% at 480 nm. Numbers correspond to the identified compounds shown in Tables 1 and 4.

**Figure S5.** HPLC chromatogram of betalains and phenolic compounds from (a) OPD, (b) BN ED 1%, and (c) BN ED 0.5% at 535 nm. Numbers correspond to the identified compounds shown in Tables 1 and 4.

**Table S1.** Physicochemical characteristics of Brazil nuts (BN), fresh *Opuntia stricta* var. *dillenii* fruits, and standardized Brazil nut beverage (BNB).

**Table S2.** Encapsulation efficiency of main betalains and phenolic compounds of Brazil nut beverages with 0.5% (BN ED 0.5%) and 1% (BN ED 1%) *Opuntia stricta* dillenii pulp extract added during cold storage at 5 °C for 24 days.

**Table S3.** Total phenolic content (TPC) and oxygen radical absorbance capacity (ORAC) of Brazil nut beverages (BNs) and BN beverages with 0.5% (BN ED 0.5%) and 1% (BN ED 1%) of *Opuntia stricta* dillenii pulp extract added during storage at 5°C for 24 days analyzed after TCA extraction method.

**Table S4.** Total phenolic content (TPC) and oxygen radical absorbance capacity (ORAC) of Brazil nut beverages (BNs) and BN beverages with 0.5% (BN ED 0.5%) and 1% (BN ED 1%) of *Opuntia Stricta* var. *Dillenii* pulp extract added during storage at 5°C for 24 days directly analyzed from the beverages.

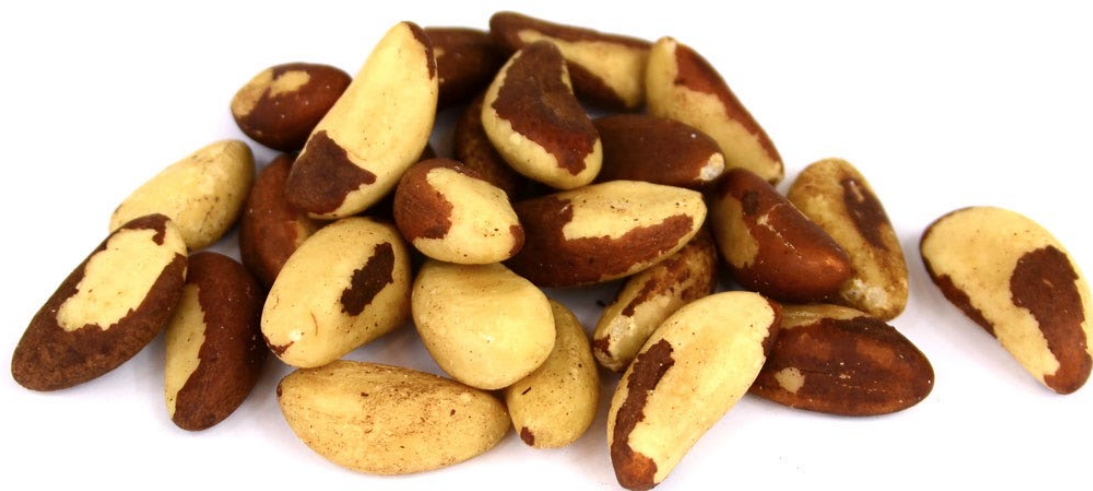

**Figure S1.** Image of Brazil nut (*Bertholletia excels* HBK).

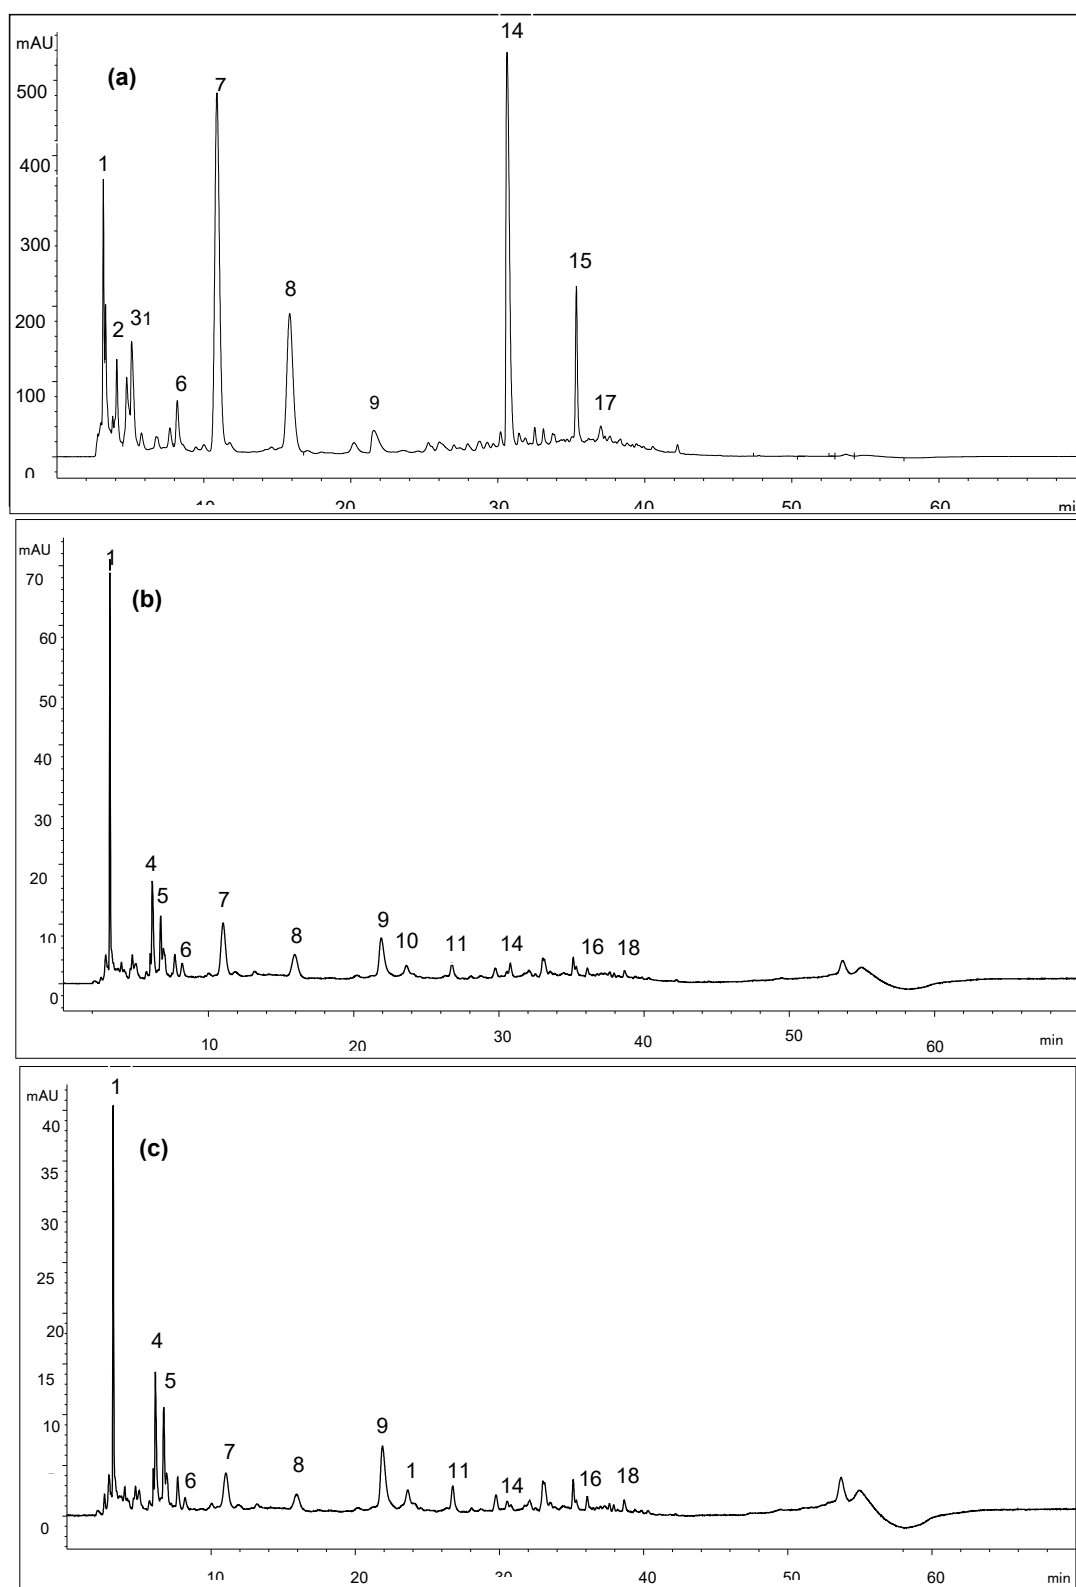

**Figure S2.** HPLC chromatogram of betalains and phenolic compounds from (a) OPD, (b) BN ED 1%, and (c) BN ED 0.5% at 280 nm. Numbers correspond to the identified compounds shown in Tables 1 and 4.

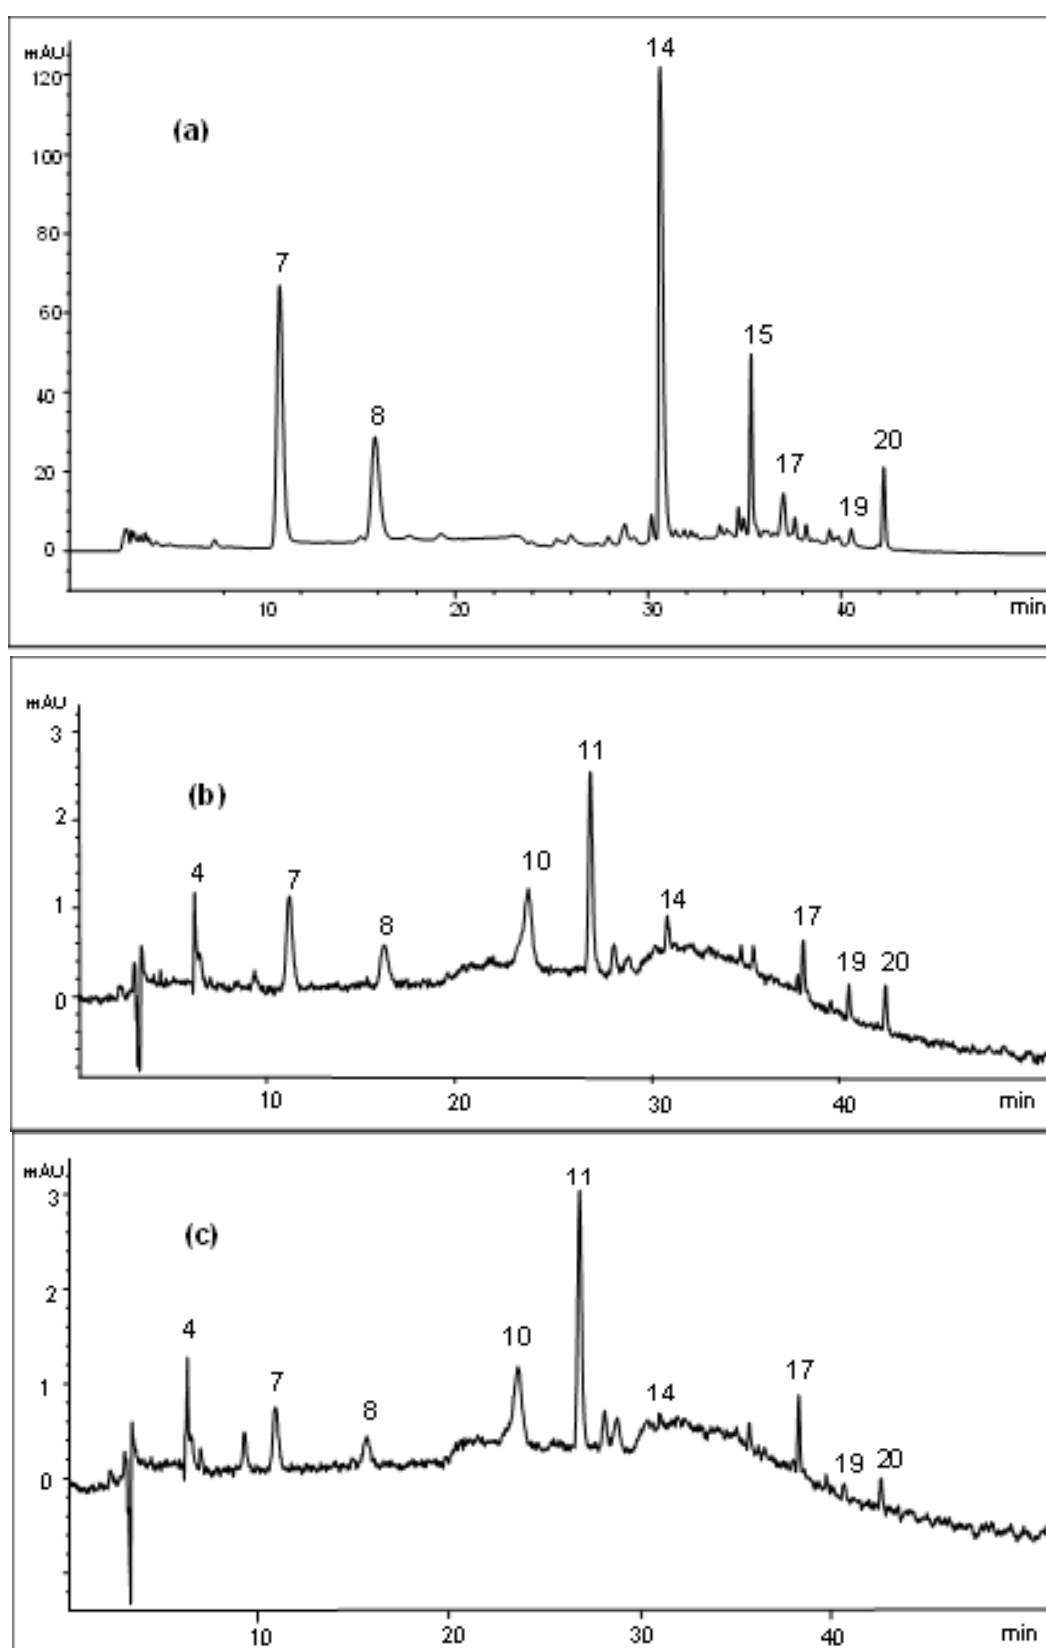

**Figure S3.** HPLC chromatogram of betalains and phenolic compounds from (a) OPD, (b) BN ED 1%, and (c) BN ED 0.5% at 370 nm. Numbers correspond to the identified compounds indicated in Tables 4 and 5.

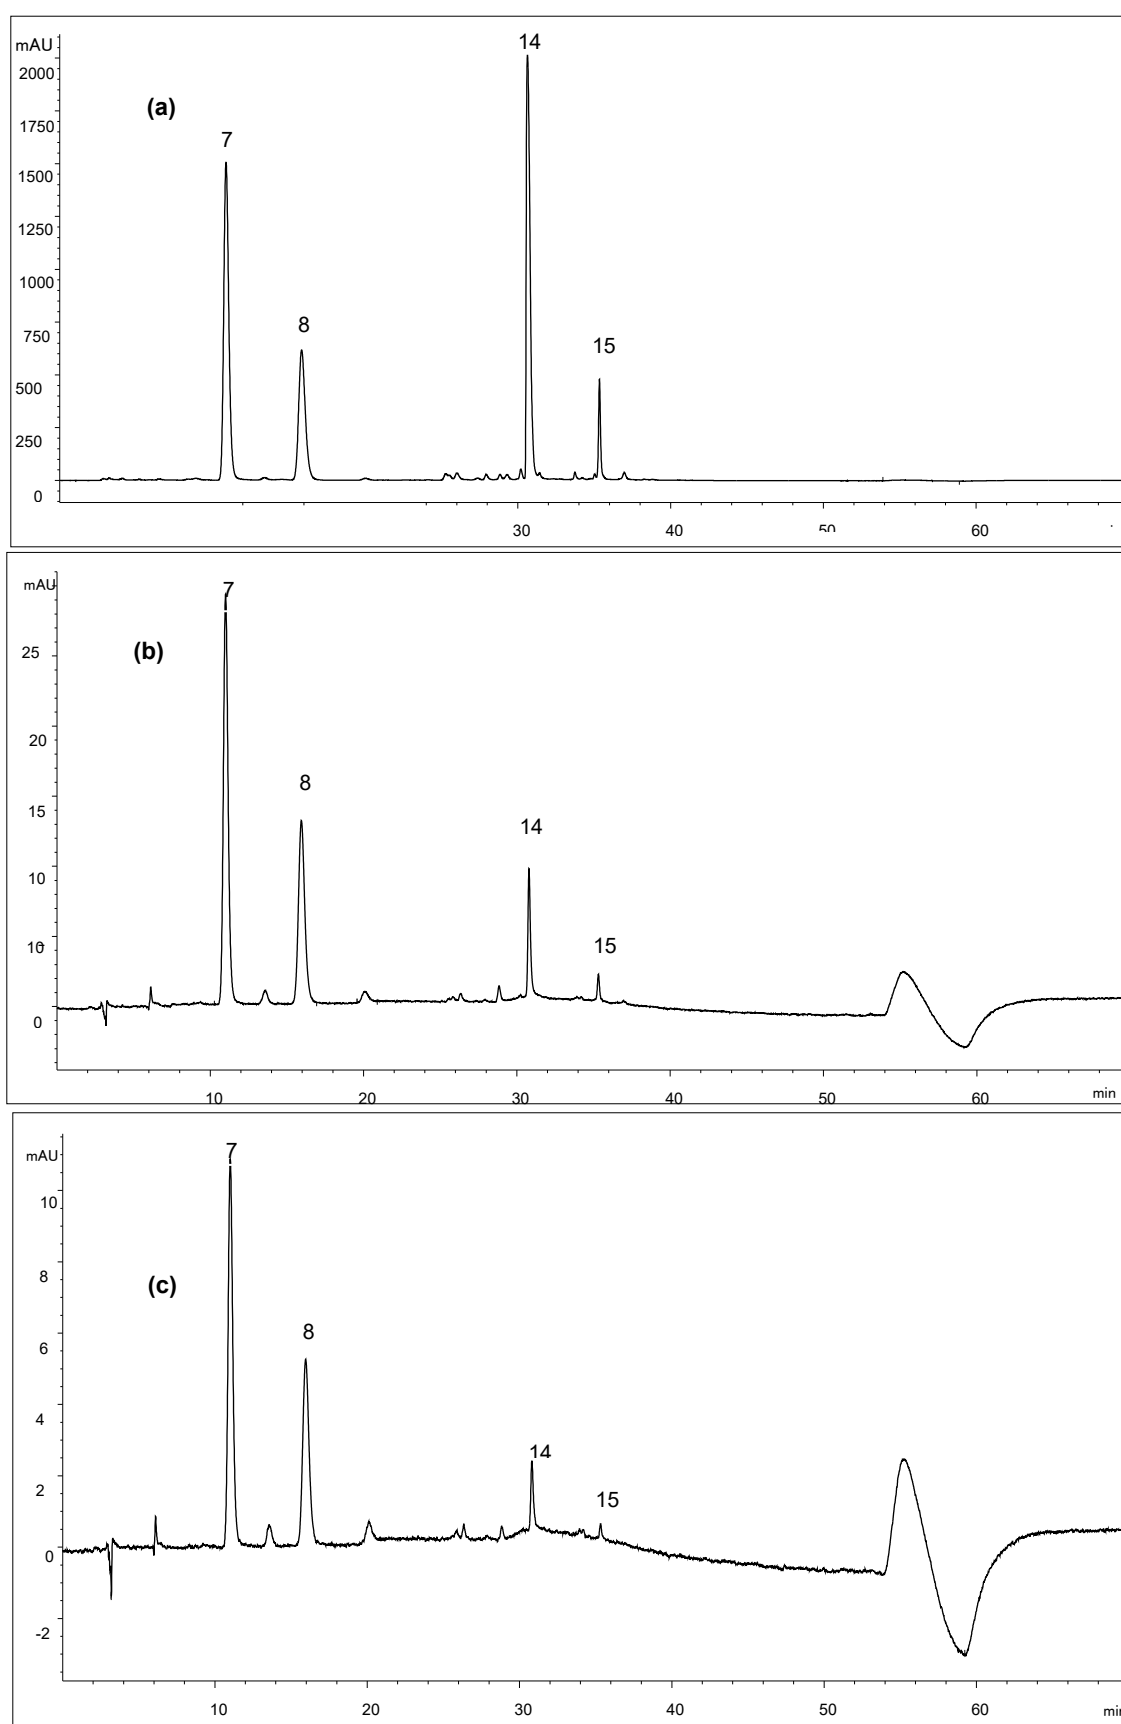

**Figure S4.** HPLC chromatogram of betalains and phenolic compounds from (a) OPD, (b) BN ED 1%, and (c) BN ED 0.5% at 480 nm. Numbers correspond to the identified compounds shown in Tables 1 and 4.

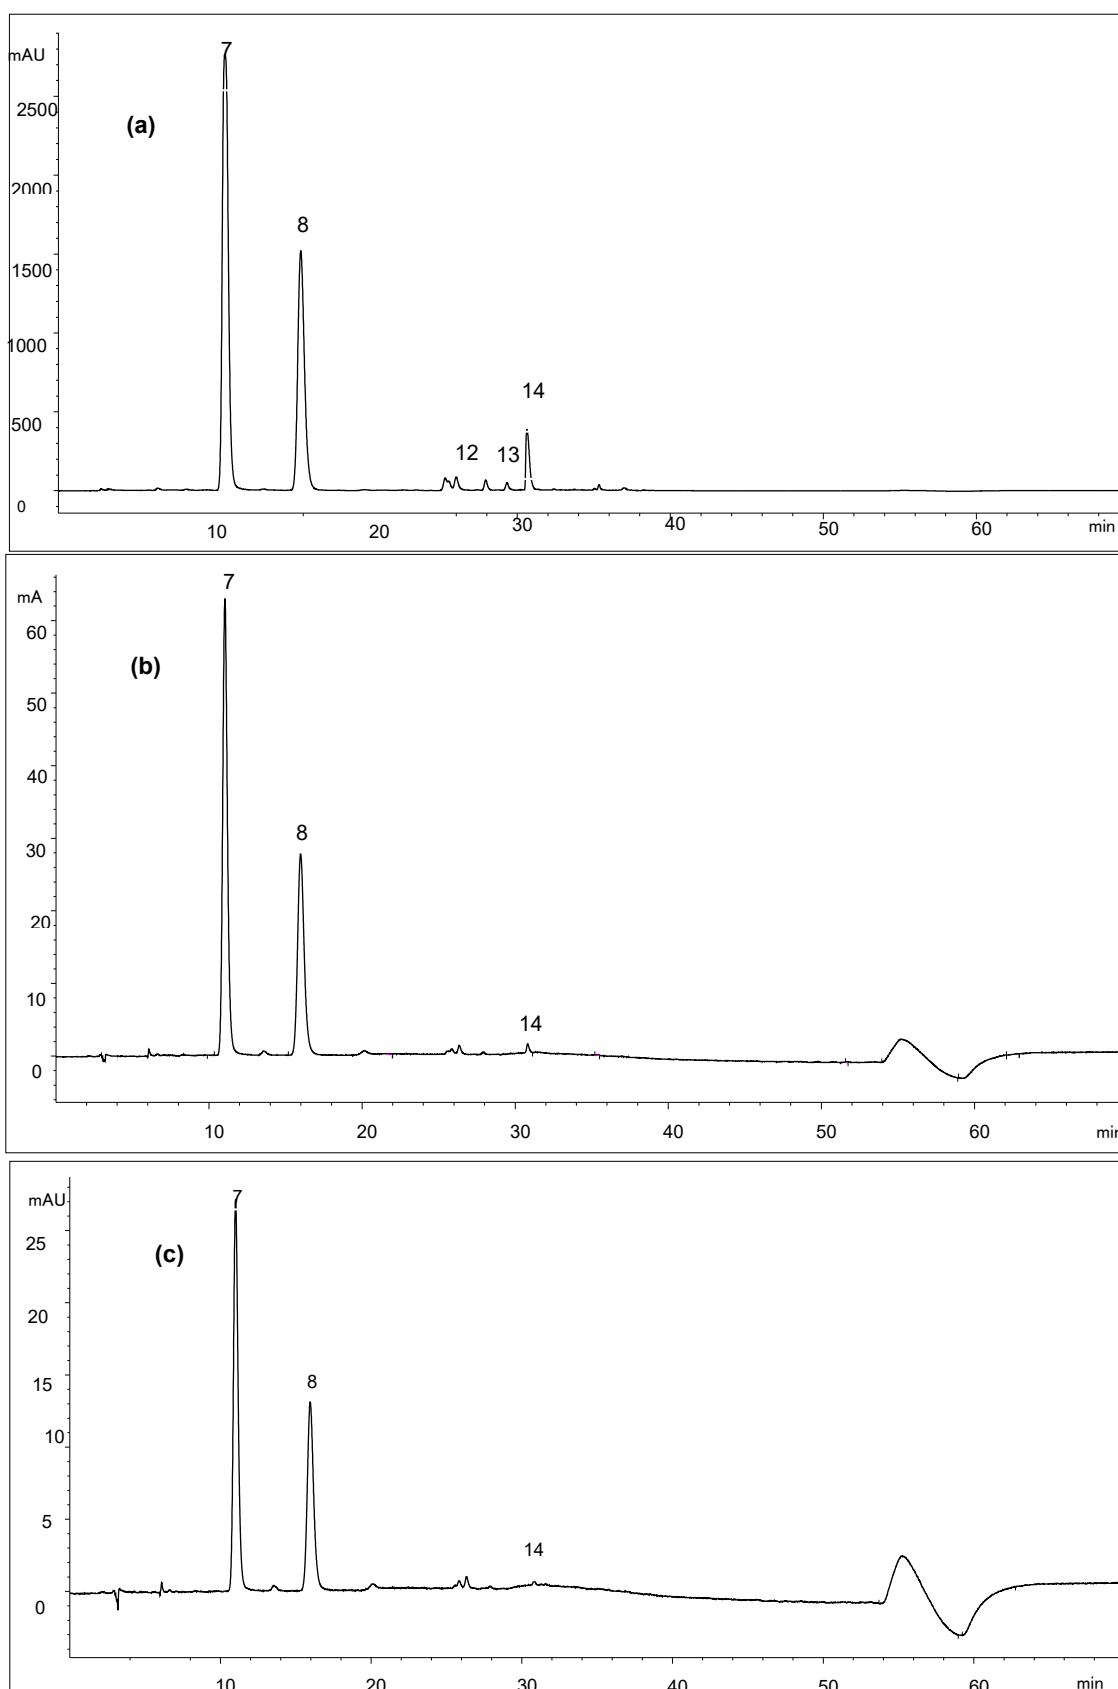

**Figure S5.** HPLC chromatogram of betalains and phenolic compounds from (a) OPD, (b) BN ED 1%, and (c) BN ED 0.5% at 535 nm. Numbers correspond to the identified compounds shown in Tables 1 and 4.

**Table S1.** Physicochemical characteristics of Brazil nuts (BNs), fresh *Opuntia stricta* var. *dillenii* fruits, and standardized Brazil nut beverage (BNB).

| Characteristic                                  | Brazil Nut (BN) | <i>Opuntia stricta</i> var. <i>dillenii</i> Fruit Pulp | Brazil Nut Standardized Beverage (BNB) |
|-------------------------------------------------|-----------------|--------------------------------------------------------|----------------------------------------|
| Protein (% $\omega/\omega$ )                    | 17.3 $\pm$ 0.4  | -                                                      | 1.27 $\pm$ 0.0                         |
| Lipid (% $\omega/\omega$ )                      | 66.1 $\pm$ 1.1  | -                                                      | 2.9 $\pm$ 0.0                          |
| Carbohydrates <sup>1</sup> (% $\omega/\omega$ ) | 10.9 $\pm$ 1.5  | 36.7 $\pm$ 5.7                                         | 1.06 $\pm$ 1.0                         |
| Ashes (% $\omega/\omega$ )                      | 3.4 $\pm$ 0.02  | -                                                      | 0.14 $\pm$ 0.0                         |
| Energy (kcal)                                   | 707.9 $\pm$ 1.5 | -                                                      | 41.3 $\pm$ 1.1                         |
| Total solids (% $\omega/\omega$ )               | 97.8 $\pm$ 0.03 | 17.55 $\pm$ 2.82                                       | 5.7 $\pm$ 0.3                          |
| Wet (% $\omega/\omega$ )                        | 2.2 $\pm$ 0.03  | 82.45 $\pm$ 3.21                                       | 94.3 $\pm$ 0.3                         |
| Ph                                              | 6.14 $\pm$ 0.1  | 3.28 $\pm$ 0.05                                        | 6.65 $\pm$ 0.1                         |
| Acidity <sup>2</sup>                            | 0.18 $\pm$ 0.0  | 1.58 $\pm$ 0.1                                         | 0.03 $\pm$ 0.0                         |
| Soluble solids ( $^{\circ}$ Brix)               | 14.5 $\pm$ 0.1  | 11.6 $\pm$ 0.2                                         | 2.23 $\pm$ 0.1                         |

<sup>1</sup> Total carbohydrates of fruit pulp in g of carbohydrates/100 g of *O. dillenii* pulp. <sup>2</sup> Expressed as g of citric acid/100 ml of beverage or g of citric acid/100 g of *O. dillenii* fruit pulp or Brazil nut.

**Table S2.** Encapsulation efficiency of main betalains and phenolic compounds of Brazil nut beverages with 0.5% (BN ED 0.5%) and 1 % (BN ED 1%) *Opuntia stricta* dillenii pulp extract added during cold storage at 5 °C for 24 days.

|                                                 |            | Recovery Efficiency (%)        |                                 |                                 |                                 |                                 |                                |  |
|-------------------------------------------------|------------|--------------------------------|---------------------------------|---------------------------------|---------------------------------|---------------------------------|--------------------------------|--|
|                                                 |            | Days of Storage at 5 °C        |                                 |                                 |                                 |                                 |                                |  |
| COMPOUND                                        | Samples    | 0                              | 1                               | 3                               | 8                               | 12                              | 24                             |  |
| Piscidic acid                                   | BN ED 1%   | 93.67 $\pm$ 0.41 <sup>Ba</sup> | 91.61 $\pm$ 0.41 <sup>Ba</sup>  | 88.74 $\pm$ 0.39 <sup>Bb</sup>  | 88.12 $\pm$ 0.39 <sup>Bb</sup>  | 80.11 $\pm$ 0.35 <sup>Bc</sup>  | 78.47 $\pm$ 0.35 <sup>Bc</sup> |  |
|                                                 | BN ED 0.5% | 81.20 $\pm$ 0.40 <sup>Aa</sup> | 79.11 $\pm$ 0.73 <sup>Aa</sup>  | 73.73 $\pm$ 0.83 <sup>Ab</sup>  | 69.87 $\pm$ 0.59 <sup>Ab</sup>  | 68.45 $\pm$ 0.77 <sup>Ac</sup>  | 64.60 $\pm$ 0.88 <sup>Ac</sup> |  |
| Betanin                                         | BN ED 1%   | 98.84 $\pm$ 1.07 <sup>Ba</sup> | 91.47 $\pm$ 0.68 <sup>Bab</sup> | 83.77 $\pm$ 0.62 <sup>Bbc</sup> | 82.38 $\pm$ 0.61 <sup>Bbc</sup> | 78.23 $\pm$ 0.58 <sup>Bc</sup>  | 75.06 $\pm$ 0.56 <sup>Bc</sup> |  |
|                                                 | BN ED 0.5% | 75.53 $\pm$ 0.56 <sup>Aa</sup> | 75.15 $\pm$ 0.56 <sup>Aab</sup> | 73.61 $\pm$ 0.54 <sup>Abc</sup> | 71.59 $\pm$ 0.53 <sup>Abc</sup> | 69.73 $\pm$ 0.52 <sup>Ac</sup>  | 69.15 $\pm$ 0.52 <sup>Ac</sup> |  |
| Isobetanin                                      | BN ED 1%   | 92.35 $\pm$ 1.13 <sup>Ba</sup> | 83.82 $\pm$ 1.02 <sup>Bb</sup>  | 76.13 $\pm$ 0.54 <sup>Bc</sup>  | 75.32 $\pm$ 0.92 <sup>Bc</sup>  | 70.51 $\pm$ 0.86 <sup>Bcd</sup> | 69.87 $\pm$ 0.49 <sup>Bd</sup> |  |
|                                                 | BN ED 0.5% | 73.24 $\pm$ 0.52 <sup>Aa</sup> | 71.22 $\pm$ 0.50 <sup>Ab</sup>  | 68.37 $\pm$ 0.49 <sup>Ac</sup>  | 67.32 $\pm$ 0.47 <sup>Ac</sup>  | 66.71 $\pm$ 0.47 <sup>Ac</sup>  | 62.57 $\pm$ 0.44 <sup>Ad</sup> |  |
| Neobetanin                                      | BN ED 1%   | 14.26 $\pm$ 0.27 <sup>Ba</sup> | 13.39 $\pm$ 0.26 <sup>Bab</sup> | 12.51 $\pm$ 0.24 <sup>Bbc</sup> | 12.22 $\pm$ 0.24 <sup>Bc</sup>  | 10.52 $\pm$ 0.20 <sup>Bd</sup>  | 10.22 $\pm$ 0.20 <sup>Be</sup> |  |
|                                                 | BN ED 0.5% | 7.98 $\pm$ 0.16 <sup>Aa</sup>  | 7.64 $\pm$ 0.15 <sup>Aab</sup>  | 7.20 $\pm$ 0.14 <sup>Abc</sup>  | 6.79 $\pm$ 0.13 <sup>Ac</sup>   | 6.16 $\pm$ 0.12 <sup>Ad</sup>   | 4.57 $\pm$ 0.08 <sup>Ae</sup>  |  |
| Isorhamnetin glucosyl-rhamnoside (IG1)          | BN ED 1%   | 91.56 $\pm$ 2.24 <sup>Ba</sup> | 87.66 $\pm$ 0.69 <sup>Bb</sup>  | 85.71 $\pm$ 0.77 <sup>Bbc</sup> | 78.84 $\pm$ 1.93 <sup>Bc</sup>  | 73.76 $\pm$ 1.80 <sup>Bd</sup>  | 63.58 $\pm$ 1.55 <sup>Bd</sup> |  |
|                                                 | BN ED 0.5% | 82.94 $\pm$ 2.03 <sup>Aa</sup> | 71.21 $\pm$ 1.74 <sup>Ab</sup>  | 66.23 $\pm$ 0.59 <sup>Abc</sup> | 66.13 $\pm$ 1.62 <sup>Ac</sup>  | 55.96 $\pm$ 1.36 <sup>Ad</sup>  | 55.96 $\pm$ 1.36 <sup>Ad</sup> |  |
| Isorhamnetin glucosyl-rhamnosyl-pentoside (IG2) | BN ED 1%   | 95.40 $\pm$ 2.87 <sup>a</sup>  | 95.07 $\pm$ 2.41 <sup>a</sup>   | 90.22 $\pm$ 4.46 <sup>a</sup>   | 89.00 $\pm$ 4.40 <sup>a</sup>   | 63.81 $\pm$ 1.08 <sup>b</sup>   | 46.45 $\pm$ 1.08 <sup>b</sup>  |  |
|                                                 | BN ED 0.5% | 93.70 $\pm$ 2.38 <sup>a</sup>  | 90.74 $\pm$ 0.64 <sup>a</sup>   | 89.25 $\pm$ 4.76 <sup>a</sup>   | 87.37 $\pm$ 0.44 <sup>a</sup>   | 74.75 $\pm$ 1.85 <sup>b</sup>   | 74.75 $\pm$ 1.85 <sup>b</sup>  |  |

<sup>1</sup> Data are provided as means and standard deviations (n=3). Different uppercase letters indicate statistically significant differences ( $p < 0.05$ ) among samples at the same storage time. Different lowercase letters indicate significant differences ( $p < 0.5$ ) in storage times for the same sample. <sup>2</sup> BN ED 0.5%: Brazil nut beverage with 0.5% OPD extract; NB ED 1%: Brazil nut beverage with 1% OPD extract.

**Table S3.** Total phenolic content (TPC) and oxygen radical absorbance capacity (ORAC) of Brazil nut beverages (BNs) and BN beverages with 0.5% (BN ED 0.5%) and 1% (BN ED 1%) of *Opuntia stricta* dillenii pulp extract added during storage at 5 °C for 24 days analyzed after TCA extraction method.<sup>3</sup>

| TPC (mg of GAE/100 mL of BN Beverage) <sup>1</sup> |                 |                 |                 |                  |                  |                 |
|----------------------------------------------------|-----------------|-----------------|-----------------|------------------|------------------|-----------------|
| Days of Storage at 5 °C                            |                 |                 |                 |                  |                  |                 |
| Sample <sup>2</sup>                                | 0               | 1               | 3               | 8                | 12               | 24              |
| BNB                                                | 13.57 ± 0.02 Aa | 12.5 ± 0.21 Aa  | 11.91 ± 0.06 Ab | 11.50 ± 0.09 Abc | 10.41 ± 0.1 Acd  | 10.18 ± 0.08 Ad |
| BN ED 0.5%                                         | 42.23 ± 0.02 Ba | 41.41 ± 0.74 Ba | 39.18 ± 0.03 Bb | 38.45 ± 0.08 Bbc | 38.16 ± 0.02 Bcd | 37.61 ± 0.05 Bd |
| BN ED 1%                                           | 63.61 ± 0.14 Ca | 62.85 ± 0.01 Ca | 60.60 ± 0.67 Cb | 60.94 ± 0.06 Cbc | 59.23 ± 0.30 Ccd | 57.03 ± 0.04 Cd |
| ORAC (μmol of TE/g BN of Beverage) <sup>1</sup>    |                 |                 |                 |                  |                  |                 |
| BNB                                                | 0.72 ± 0.04 Aa  | 0.70 ± 0.04 Aab | 0.66 ± 0.06 Abc | 0.64 ± 0.05 Acd  | 0.53 ± 0.04 Ade  | 0.49 ± 0.04 Ae  |
| BN ED 0.5%                                         | 1.80 ± 0.05 Ba  | 1.76 ± 0.04 Bab | 1.71 ± 0.03 Bbc | 1.66 ± 0.04 Bcd  | 1.63 ± 0.01 Bde  | 1.61 ± 0.04 Be  |
| BN ED 1%                                           | 3.67 ± 0.05 Ca  | 3.62 ± 0.03 Cab | 3.56 ± 0.05 Cbc | 3.52 ± 0.08 Ccd  | 3.45 ± 0.08 Cde  | 3.37 ± 0.09 Ce  |

<sup>1</sup> Data are provided as means and standard deviations (n = 3). Different uppercase letters indicate statistically significant differences ( $p < 0.05$ ) among samples at the same storage time. Different lowercase letters indicate significant differences ( $p < 0.5$ ) in storage times for the same sample. <sup>2</sup> BN ED 0.5%: Brazil nut beverage with 0.5% OPD extract; NB ED 1%: Brazil nut beverage with 1% OPD extract. <sup>3</sup> TCA extraction method reported by Naderi et al. (2010).

**Table S4.** Total phenolic content (TPC) and oxygen radical absorbance capacity (ORAC) of Brazil nut beverages (BNs) and BN beverages with 0.5% (BN ED 0.5%) and 1% (BN ED 1%) of *Opuntia Stricta* var. *Dillenii* pulp extract added during storage at 5 °C for 24 days directly analyzed from the beverages.<sup>1</sup>

| TPC (mg of GAE/100 mL of Beverage) <sup>2</sup> |                 |                 |                  |                  |                  |                 |
|-------------------------------------------------|-----------------|-----------------|------------------|------------------|------------------|-----------------|
| Days of Storage at 5 °C                         |                 |                 |                  |                  |                  |                 |
| Sample <sup>3</sup>                             | 0               | 1               | 3                | 8                | 12               | 24              |
| BNB                                             | 11.38 ± 1.66 Aa | 11 ± 1.44 Aa    | 9.69 ± 0.27 Aab  | 8.27 ± 0.07 Abc  | 10.41 ± 0.55 Acd | 6.25 ± 0.35 Ad  |
| BN ED 0.5%                                      | 35.67 ± 0.64 Ba | 33.38 ± 1.24 Ba | 32.15 ± 1.21 Bab | 31.3 ± 1.51 Bbc  | 29.19 ± 1.34 Bcd | 25.29 ± 1.18 Bd |
| BN ED 1%                                        | 53.18 ± 1.51 Ca | 51.18 ± 1.94 Ca | 49.95 ± 1.8 Cab  | 45.45 ± 2.98 Cbc | 45.45 ± 3.15 Ccd | 40.18 ± 2.76 Cd |
| ORAC (μmol of TE/gr of Beverage) <sup>1</sup>   |                 |                 |                  |                  |                  |                 |
| BNB                                             | 0.50 ± 0.03 Aa  | 0.48 ± 0.03 Aab | 0.46 ± 0.01 Aab  | 0.41 ± 0.01 Abc  | 0.38 ± 0.03 Acd  | 0.33 ± 0.04 Ad  |
| BN ED 0.5%                                      | 1.58 ± 0.06 Ba  | 1.56 ± 0.07 Bab | 1.50 ± 0.04 Bab  | 1.66 ± 0.04 Bbc  | 1.46 ± 0.06 Bcd  | 1.39 ± 0.06 Bd  |
| BN ED 1%                                        | 2.98 ± 0.06 Ca  | 2.94 ± 0.06 Cab | 2.91 ± 0.04 Cab  | 2.87 ± 0.04 Cbc  | 2.81 ± 0.02 Ccd  | 2.75 ± 0.04 Cd  |

<sup>1</sup> Total phenolic content (TPC) and oxygen radical absorbance capacity (ORAC) analysis was conducted directly from samples without previous extraction. <sup>2</sup> Data are provided as means and standard deviations (n = 3). Different uppercase letters indicate statistically significant differences ( $p < 0.05$ ) among samples at the same storage time. Different lowercase letters indicate significant differences ( $p < 0.5$ ) in storage times for the same sample. <sup>3</sup> BN ED 0.5%: Brazil nut beverage with 0.5% OPD extract; NB ED 1%: Brazil nut beverage with 1% OPD extract.
